# Supplementary material for: Danofloxacin Treatment Alters the Diversity and Resistome Profile of Gut Microbiota in Calves
Source: MDPI journal article supplement (doi:10.3390/microorganisms9102023), 2021-09-24
Supplement: s1 [file s1]

**Table S1.** The relative abundance of bacterial phyla of 30 study calves at seven sampling days over four weeks of the study period.

| Phylum                         | Sampling day (relative abundance, %) |       |       |       |       |       |       |
|--------------------------------|--------------------------------------|-------|-------|-------|-------|-------|-------|
|                                | 2                                    | 6     | 14    | 18    | 19    | 22    | 28    |
| <i>Euryarchaeota (Archaea)</i> | 0.91                                 | 1.13  | 0.82  | 0.48  | 0.72  | 0.36  | 0.73  |
| <i>Actinobacteria</i>          | 1.33                                 | 0.89  | 0.75  | 0.84  | 1.32  | 0.46  | 0.50  |
| <i>Bacteroidetes</i>           | 36.13                                | 38.43 | 28.37 | 28.94 | 27.81 | 32.29 | 28.11 |
| <i>Cyanobacteria</i>           | 0.93                                 | 0.97  | 1.44  | 0.95  | 0.42  | 0.67  | 1.25  |
| <i>Elusimicrobia</i>           | 0.59                                 | 0.38  | 0.21  | 0.20  | 0.12  | 0.46  | 0.30  |
| <i>Fibrobacteres</i>           | 0.02                                 | 0.03  | 0.02  | 0.01  | 0.01  | 0.01  | 0.02  |
| <i>Firmicutes</i>              | 51.93                                | 49.73 | 56.87 | 57.64 | 60.50 | 55.14 | 59.67 |
| <i>Fusobacteria</i>            | 0.01                                 | 0.00  | 0.00  | 0.00  | 0.00  | 0.00  | 0.00  |
| <i>Lentisphaerae</i>           | 0.01                                 | 0.08  | 0.01  | 0.02  | 0.01  | 0.04  | 0.03  |
| <i>Planctomycetes</i>          | 0.00                                 | 0.01  | 0.14  | 0.30  | 0.14  | 0.48  | 0.57  |
| <i>Proteobacteria</i>          | 3.00                                 | 2.26  | 2.72  | 2.90  | 1.15  | 1.63  | 2.20  |
| <i>Spirochaetes</i>            | 1.94                                 | 3.07  | 1.68  | 1.53  | 1.07  | 1.34  | 2.15  |
| <i>Synergistetes</i>           | 0.01                                 | 0.09  | 0.02  | 0.01  | 0.01  | 0.01  | 0.03  |
| <i>Tenericutes</i>             | 2.18                                 | 1.24  | 2.08  | 1.67  | 1.94  | 1.86  | 1.93  |
| <i>Verrucomicrobia</i>         | 1.03                                 | 1.68  | 4.86  | 4.51  | 4.78  | 5.25  | 2.51  |

**Table S2.** Comparisons of the relative abundance of bacterial taxa between control (group A) and treatment (group B—non-BRD-induced and group C—BRD-induced) groups.

| Phyla                  | Classes                      | Relative abundance (%) |       |       | All groups<br>( <i>p</i> *) | Pair-wise comparison |                     |                     |
|------------------------|------------------------------|------------------------|-------|-------|-----------------------------|----------------------|---------------------|---------------------|
|                        |                              | A                      | B     | C     |                             | A-B<br>( <i>p</i> )  | A-C<br>( <i>p</i> ) | B-C<br>( <i>p</i> ) |
| <i>Euryarchaeota</i>   | <i>Methanobacteria</i>       | 0.52                   | 0.82  | 0.81  | 0.000                       | 0.001                | 0.000               | 0.572               |
|                        | <i>Thermoplasmata</i>        | 0.00                   | 0.01  | 0.01  | 0.000                       | 0.000                | 0.005               | 0.233               |
| <i>Acidobacteria</i>   | <i>Holophagae</i>            | 0.00                   | 0.00  | 0.00  | 0.363                       | NA                   | NA                  | NA                  |
| <i>Actinobacteria</i>  | <i>Actinobacteria</i>        | 0.40                   | 0.47  | 0.13  | 0.000                       | 0.513                | 0.000               | 0.000               |
|                        | <i>Coriobacteriia</i>        | 0.49                   | 0.63  | 0.53  | 0.371                       | NA                   | NA                  | NA                  |
| <i>Bacteroidetes</i>   | <i>Bacteroidia</i>           | 31.18                  | 30.89 | 32.80 | 0.268                       | NA                   | NA                  | NA                  |
| <i>Cyanobacteria</i>   | <i>4C0d-2</i>                | 0.83                   | 1.08  | 0.87  | 0.496                       | NA                   | NA                  | NA                  |
|                        | <i>Chloroplast</i>           | 0.00                   | 0.00  | 0.00  | 0.189                       | NA                   | NA                  | NA                  |
| <i>Elusimicrobia</i>   | <i>Elusimicrobia</i>         | 0.27                   | 0.39  | 0.32  | 0.842                       | NA                   | NA                  | NA                  |
| <i>Fibrobacteres</i>   | <i>Fibrobacteria</i>         | 0.02                   | 0.01  | 0.02  | 0.041                       | 0.096                | 0.716               | 0.057               |
| <i>Firmicutes</i>      | <i>Bacilli</i>               | 0.07                   | 0.05  | 0.05  | 0.021                       | 0.057                | 0.029               | 0.695               |
|                        | <i>Clostridia</i>            | 56.85                  | 55.48 | 53.49 | 0.063                       | NA                   | NA                  | NA                  |
|                        | <i>Erysipelotrichi</i>       | 0.43                   | 0.64  | 0.59  | 0.002                       | 0.001                | 0.083               | 0.145               |
| <i>Planctomycetes</i>  | <i>Planctomycetia</i>        | 0.60                   | 0.13  | 0.04  | 0.000                       | 0.008                | 0.008               | 0.002               |
| <i>Proteobacteria</i>  | <i>Alphaproteobacteria</i>   | 0.34                   | 0.51  | 0.43  | 0.130                       | NA                   | NA                  | NA                  |
|                        | <i>Betaproteobacteria</i>    | 0.24                   | 0.36  | 0.51  | 0.000                       | 0.011                | 0.000               | 0.033               |
|                        | <i>Deltaproteobacteria</i>   | 0.85                   | 0.74  | 0.65  | 0.130                       | NA                   | NA                  | NA                  |
|                        | <i>Epsilonproteobacteria</i> | 0.06                   | 0.30  | 0.32  | 0.004                       | 0.003                | 0.038               | 0.368               |
|                        | <i>Gammaproteobacteria</i>   | 0.47                   | 0.50  | 0.46  | 0.275                       | NA                   | NA                  | NA                  |
| <i>Spirochaetes</i>    | <i>Spirochaetes</i>          | 1.97                   | 2.22  | 1.34  | 0.067                       | NA                   | NA                  | NA                  |
| <i>Synergistetes</i>   | <i>Synergistia</i>           | 0.05                   | 0.02  | 0.02  | 0.000                       | 0.000                | 0.000               | 0.877               |
| <i>Tenericutes</i>     | <i>Mollicutes</i>            | 1.17                   | 1.87  | 1.57  | 0.000                       | 0.000                | 0.009               | 0.200               |
|                        | <i>RF3</i>                   | 0.21                   | 0.24  | 0.36  | 0.010                       | 0.716                | 0.016               | 0.031               |
|                        | <i>Verruco-5</i>             | 0.09                   | 0.13  | 0.05  | 0.144                       | NA                   | NA                  | NA                  |
| <i>Verrucomicrobia</i> | <i>Verrucomicrobiae</i>      | 2.87                   | 2.47  | 4.61  | 0.006                       | 0.549                | 0.032               | 0.008               |

\*Adjusted p-value, the Kruskal–Wallis test was used to compare the three groups and Dunn test for pair-wise comparisons. NA—not applicable to carry out a pair-wise comparison if the test performed by the Kruskal–Wallis test does not show a significant difference among the groups.

**Table S3.** The Spearman rank correlation test between *Campylobacter* and other genera in the whole fecal samples (all groups combined). *P*-value was adjusted using the False Discovery Rate (FDR)

| Phylum         | Order              | Family                     | Genus                 | R*    | FDR   |
|----------------|--------------------|----------------------------|-----------------------|-------|-------|
| Actinobacteria | Actinomycetales    | Microbacteriaceae          | unclassified          | 0.45  | 0.000 |
| Bacteroidetes  | Bacteroidales      | [Odoribacteraceae]         | Odoribacter           | -0.22 | 0.016 |
|                | Bacteroidales      | [Paraprevotellaceae]       | [Prevotella]          | -0.20 | 0.044 |
|                | Bacteroidales      | [Paraprevotellaceae]       | CF231                 | -0.29 | 0.001 |
|                | Bacteroidales      | Unclassified               | unclassified          | 0.27  | 0.001 |
|                | Bacteroidales      | Bacteroidaceae             | Bacteroides           | -0.19 | 0.047 |
|                | Bacteroidales      | Porphyromonadaceae         | Parabacteroides       | -0.19 | 0.049 |
|                | Bacteroidales      | Prevotellaceae             | Prevotella            | -0.27 | 0.001 |
|                | Bacteroidales      | S24-7                      | unclassified          | -0.29 | 0.001 |
| Cyanobacteria  | YS2                | Unclassified               | unclassified          | 0.22  | 0.017 |
| Euryarchaeota  | E2                 | [Methanomassiliicoccaceae] | vadinCA11             | 0.34  | 0.000 |
| Firmicutes     | Clostridiales      | Christensenellaceae        | unclassified          | 0.27  | 0.002 |
|                | Clostridiales      | Eubacteriaceae             | Anaerofustis          | 0.22  | 0.017 |
|                | Clostridiales      | Lachnospiraceae            | Blautia               | -0.20 | 0.035 |
|                | Clostridiales      | Peptococcaceae             | unclassified          | 0.27  | 0.001 |
|                | Clostridiales      | Veillonellaceae            | Phascolarctobacterium | -0.25 | 0.003 |
|                | SHA-98             | Unclassified               | unclassified          | 0.20  | 0.031 |
|                | Unclassified       | Unclassified               | unclassified          | 0.27  | 0.001 |
| Proteobacteria | Desulfovibrionales | Desulfovibrionaceae        | Desulfovibrio         | -0.22 | 0.015 |
|                | Desulfovibrionales | Desulfovibrionaceae        | unclassified          | 0.47  | 0.000 |
|                | Rhizobiales        | Hyphomicrobiaceae          | Devosia               | 0.28  | 0.001 |

\*R – correlation coefficient

**Table S4.** The Spearman rank correlation test between *Campylobacter* and other genera in pre- and post-treatment samples (groups B and C combined). *P*-value was adjusted using the False Discovery Rate (FDR).

| <b>Pre-Treatment</b>  |                    |                            |                 |           |            |
|-----------------------|--------------------|----------------------------|-----------------|-----------|------------|
| <b>Phylum</b>         | <b>Order</b>       | <b>Family</b>              | <b>Genus</b>    | <b>R*</b> | <b>FDR</b> |
| Actinobacteria        | Actinomycetales    | Microbacteriaceae          | unclassified    | 0.45      | 0.002      |
| Bacteroidetes         | Bacteroidales      | [Paraprevotellaceae]       | CF231           | -0.35     | 0.038      |
|                       | Bacteroidales      | Prevotellaceae             | Prevotella      | -0.33     | 0.053      |
| Firmicutes            | Bacillales         | Planococcaceae             | Lysinibacillus  | 0.63      | 0.000      |
|                       | Clostridiales      | Lachnospiraceae            | Anaerostipes    | 0.42      | 0.005      |
|                       | Erysipelotrichales | Erysipelotrichaceae        | Bulleidia       | 0.35      | 0.035      |
| Proteobacteria        | Desulfovibrionales | Desulfovibrionaceae        | unclassified    | 0.39      | 0.012      |
| Verrucomicrobia       | Verrucomicrobiales | Verrucomicrobiaceae        | Akkermansia     | 0.48      | 0.000      |
| <b>Post-Treatment</b> |                    |                            |                 |           |            |
| Actinobacteria        | Coriobacteriales   | Coriobacteriaceae          | Slackia         | 0.43      | 0.024      |
| Bacteroidetes         | Bacteroidales      | [Odoribacteraceae]         | Odoribacter     | -0.40     | 0.046      |
|                       | Bacteroidales      | p-2534-18B5                | unclassified    | 0.45      | 0.015      |
| Cyanobacteria         | YS2                | unclassified               | unclassified    | 0.46      | 0.014      |
| Elusimicrobia         | Elusimicrobiales   | Elusimicrobiaceae          | unclassified    | 0.53      | 0.002      |
| Euryarchaeota         | E2                 | [Methanomassiliicoccaceae] | vadinCA11       | 0.46      | 0.014      |
| Firmicutes            | Clostridiales      | Christensenellaceae        | unclassified    | 0.41      | 0.037      |
|                       | Clostridiales      | Dehalobacteriaceae         | Dehalobacterium | 0.42      | 0.032      |
|                       | Clostridiales      | Eubacteriaceae             | Anaerofustis    | 0.39      | 0.052      |
|                       | Lactobacillales    | Carnobacteriaceae          | unclassified    | 0.40      | 0.046      |
| Proteobacteria        | RF32               | unclassified               | unclassified    | 0.47      | 0.012      |
|                       | Desulfovibrionales | Desulfovibrionaceae        | unclassified    | 0.57      | 0.000      |

\*R—correlation coefficient

**Table S5.** Summary of antimicrobial resistance genes detected in pre-and post-treatment fecal samples along with their respective bacterial reservoirs in calf group B. The number of hits for the respective ARG is indicated in the parentheses. NA (not available) represents undetected bacterial taxon.

| Phylum         | Lower level                                        | Pre-treatment                                                                                                    | Post-treatment                                                                            |
|----------------|----------------------------------------------------|------------------------------------------------------------------------------------------------------------------|-------------------------------------------------------------------------------------------|
| Actinobacteria | bacterium_OL_1                                     | ermB(1*)                                                                                                         | tetW(6)                                                                                   |
|                | Isophtericola_variabilis_225                       | NA**                                                                                                             | tetQ(5)                                                                                   |
|                | Bifidobacterium_merycicum_DSM_6492                 | tetW(2)                                                                                                          | NA                                                                                        |
|                | Parascardovia_denticolens_IPLA_20019               | tetW(1)                                                                                                          | NA                                                                                        |
|                | Streptomyces_coelicolor_A3_2                       | ermG(14), tetW(2)                                                                                                | NA                                                                                        |
|                | Mycobacterium_abscessus_subsp._bolletii_str._GO_06 | NA                                                                                                               | tetW(10)                                                                                  |
|                | Mycobacterium_intracellulare_MOTT_02               | NA                                                                                                               | ant9(80), tet40(1),<br>tetW(11)                                                           |
|                | Olsenella_profusa_F0195                            | NA                                                                                                               | aph2(1), aph3(1), ant9(2),<br>tet40(1), tetW(10)                                          |
| Arthropoda     | Glyphodes pyloalis                                 | tetQ(1)                                                                                                          | NA                                                                                        |
|                | Pogonomyrmex_barbatus                              | NA                                                                                                               | ant6(1), tet40(20),<br>tet44(1), tetO(2), tetQ(1),<br>tetW(1)                             |
| Bacteroidetes  | Alistipes_finegoldii_DSM_17242                     | NA                                                                                                               | cfX(1), tet40(4), tetQ(4),<br>tetW(1), tetX(1)                                            |
|                | Bacteroides_stercoris_ATCC_43183                   | NA                                                                                                               | tet40(2), tetQ(2), tetW(2)                                                                |
|                | Flavobacterium_indicum_GPTSA100_9_DSM_17447        | NA                                                                                                               | tet40(1), tetW(31)                                                                        |
|                | Prevotella_sp.                                     | tetQ(1)                                                                                                          | ant6(3), cfX(1), ermF(1),<br>ermG(1), mefE(1), cfR(2),<br>tet40(7), tetQ(170),<br>tetW(5) |
|                | Prevotella_stercorea_DSM_18206                     | NA                                                                                                               | aph2(1), aph3(1),<br>tetQ(18)                                                             |
| Euryarchaeota  | Methanobrevibacter_ruminantium_M1                  | ant9(1), tetO(1)                                                                                                 | No ARGs                                                                                   |
|                | Methanosphaera_stadtmanae_DSM_3091                 | tetA(2)                                                                                                          | NA                                                                                        |
| Firmicutes     | Anaerotruncus_sp._CAG_528                          | NA                                                                                                               | tet32(3), tet40(5), tetO(3)                                                               |
|                | Bacillus_cereus_FRI_35                             | NA                                                                                                               | ant6(1), cfR(1), tetW(2)                                                                  |
|                | Butyrivibrio_sp._AE2032                            | NA                                                                                                               | aph2(2), aph3(2), ant6(4),<br>sat(3), cfR(1)                                              |
|                | Clostridium_aminophilum_DSM_10710                  | NA                                                                                                               | tet40(13), tetW(12)                                                                       |
|                | Clostridium_sp.                                    | aph2(15), aph3(7),<br>ant6(7), ant9(8), sat(7),<br>ermB(1), tet40(1),<br>tet44(1), tetO(10),<br>tetQ(1), tetW(5) | aph2(9), aph3(9),<br>ant6(13), sat(13),<br>ermG(2), tet40(3),<br>tetL(63), tetW(215)      |
|                | Dorea_sp._CAG_317                                  | NA                                                                                                               | tet40(19), tetO(3),<br>tetW(10)                                                           |
|                | Erysipelotrichaceae_bacterium_5_2_54FAA            | NA                                                                                                               | tet40(2), tetO(2), tetW(1)                                                                |
|                | Ethanoligenens_harbinense_YUAN_3                   | NA                                                                                                               | tetW(32)                                                                                  |
|                | Eubacterium_cellulosolvens_6                       | tet40(1), tetO(10),<br>tetW(2)                                                                                   | NA                                                                                        |
|                | Eubacterium_nodatum_ATCC_33099                     | NA                                                                                                               | tetW(15)                                                                                  |
|                | Eubacterium_rectale_ATCC_33656                     | NA                                                                                                               | tet40(5), tetO(6),<br>tetW(55)                                                            |
|                | Eubacterium_sp.                                    | ant6(4), cfX(1), tet40(3),<br>tet44(2), tetO(3),<br>tetW(5)                                                      | ant6(2), tet32(3),<br>tet40(54), tetO(12),<br>tetW(314)                                   |
|                | Eubacterium_ventriosum_ATCC_27560                  | NA                                                                                                               | aph2(9), aph3(9), ant9(4),<br>tet40(4), tetW(1)                                           |

|                 |                                                   |                                                                              |                                                                                |
|-----------------|---------------------------------------------------|------------------------------------------------------------------------------|--------------------------------------------------------------------------------|
|                 | Firmicutes_bacterium_CAG                          | tet40(4)                                                                     | aph2(1), aac6(1),<br>ant9(31), tet40(476),<br>tetW(388)                        |
|                 | Lachnospiraceae_bacterium_10_1                    | NA                                                                           | tet40(7), tetW(1)                                                              |
|                 | Lactobacillus_plantarum_4_3                       | ant6(1), tet40(10),<br>tetO(8)                                               | NA                                                                             |
|                 | Lactobacillus_rhamnosus_ATCC_8530                 | NA                                                                           | tetW(1)                                                                        |
|                 | Oscillibacter_ruminantium_GH1                     | NA                                                                           | tet40(283), tetW(354)                                                          |
|                 | Oscillibacter_sp._CAG_241                         | NA                                                                           | aph2(1), aac6(1), ant6(1),<br>ant9(1), cfr(1), tet40(1),<br>tetA(1), tetW(55)  |
|                 | Phascolarctobacterium_succinatutens_YIT_1206<br>7 | NA                                                                           | tet40(13), tetO(1),<br>tetQ(1), tetW(5)                                        |
|                 | Listeria_monocytogenes_M7                         | tet32(1), tet40(5),<br>tetO(2)                                               | NA                                                                             |
|                 | Roseburia_intestinalis_L1_82                      | tetB(1), tetO(10)                                                            | NA                                                                             |
|                 | Roseburia_sp.                                     | tetO(2)                                                                      | NA                                                                             |
|                 | Ruminococcus_sp.                                  | tetO(1)                                                                      | tet40(119), tetO(3),<br>tetQ(1), tetW(6)                                       |
|                 | Ruminococcus_albus_7_DSM_20455                    | NA                                                                           | tet40(73), tetO(25),<br>tetW(2)                                                |
|                 | Ruminococcus_flavefaciens_ATCC_19208              | NA                                                                           | tet40(1)                                                                       |
|                 | Ruminococcus_lactaris_CC59_002D                   | NA                                                                           | ant6(3), ant9(6), cfr(3),<br>tet40(5), tetO(2), tetW(1)                        |
|                 | Staphylococcus_warneri_SG1                        | ant6(1), tetW(1)                                                             | NA                                                                             |
|                 | Streptococcus_agalactiae_GD201008_001             | tet40(1), tetW(16)                                                           | NA                                                                             |
|                 | Sharpea_azabuensis_DSM_18934                      | aph2(6), aph3(6),<br>ant6(6), ant9(16), sat(6),<br>cfr(12), tetA(1), tetW(3) | NA                                                                             |
|                 | Sulfobacillus_acidophilus_TPY                     | NA                                                                           | ant6(1), sat(1), tetW(6)                                                       |
| Proteobacteria  | Azospirillum_brasilense_Sp245                     | NA                                                                           | tet40(1), tetW(17)                                                             |
|                 | Burkholderia_cenocepacia                          | NA                                                                           | aph2(1), aph3(1),<br>tet40(16), tetW(14)                                       |
|                 | Bradyrhizobium_japonicum_USDA_6                   | tet32(1), tet40(6),<br>tetO(1), tetW(2)                                      | NA                                                                             |
|                 | Campylobacter_conciscus_UNSWCS                    | aph2(2), aph3(1),<br>ant6(1), ant9(1), sat(1),<br>tetO(2)                    | NA                                                                             |
|                 | Marinobacter_adhaerens_HP15                       | tetO(1)                                                                      | NA                                                                             |
|                 | Geobacter_sulfurreducens_PCA                      | NA                                                                           | aph2(1), aac6(1), ant6(1),<br>ant9(1), cfr(1), tet40(8),<br>tetQ(256), tetW(4) |
|                 | Hyphomicrobium_nitratorans_NL23                   | NA                                                                           | tet40(3), tetL(1), tetW(18)                                                    |
|                 | Klebsiella_oxytoca_KCTC_1686                      | NA                                                                           | tet40(1)                                                                       |
|                 | Pseudoxanthomonas_sp._GW2                         | NA                                                                           | tet40(1), tetW(433)                                                            |
| Spirochaetes    | Brachyspira_pilosicoli_WesB                       | NA                                                                           | ant6(1), sat(1), tet40(2),<br>tet44(1), tetW(491)                              |
| Tenericutes     | Mycoplasma_sp._CAG_877                            | NA                                                                           | No ARGs                                                                        |
|                 | Mycoplasma_dispar                                 | tet40(1)                                                                     | NA                                                                             |
| Verrucomicrobia | Akkermansia_muciniphila_ATCC_BAA_835              | tet40(1)                                                                     | ant6(1), cfr(1), tet40(2),<br>tetW(1)                                          |

\* Number of hits; \*\*NA — not available, this bacterial taxon was not detected. .
